# Supplementary material
Source: publisher site journal article supplement (https://www.dovepress.com/article/590652)
Supplement: Supplementary file 1 [file 590652%20Supplementary%20Material.docx]

**TABLE OF CONTENTS**

**Supporting figures**

**Figure S1** S2

**Figure S2** S3

**Figure S3** S4

**Figure S4** S5

**Figure S5** S6

**Figure S6** S7

**Figure S7** S8

**Figure S8** S9

**Figure S9** S10

**Figure S10** S11

**Figure S11** S12

**Figure S12** S13

**Figure S13** S14

**Supporting tables**

**Table S1** S15

# Supporting figures


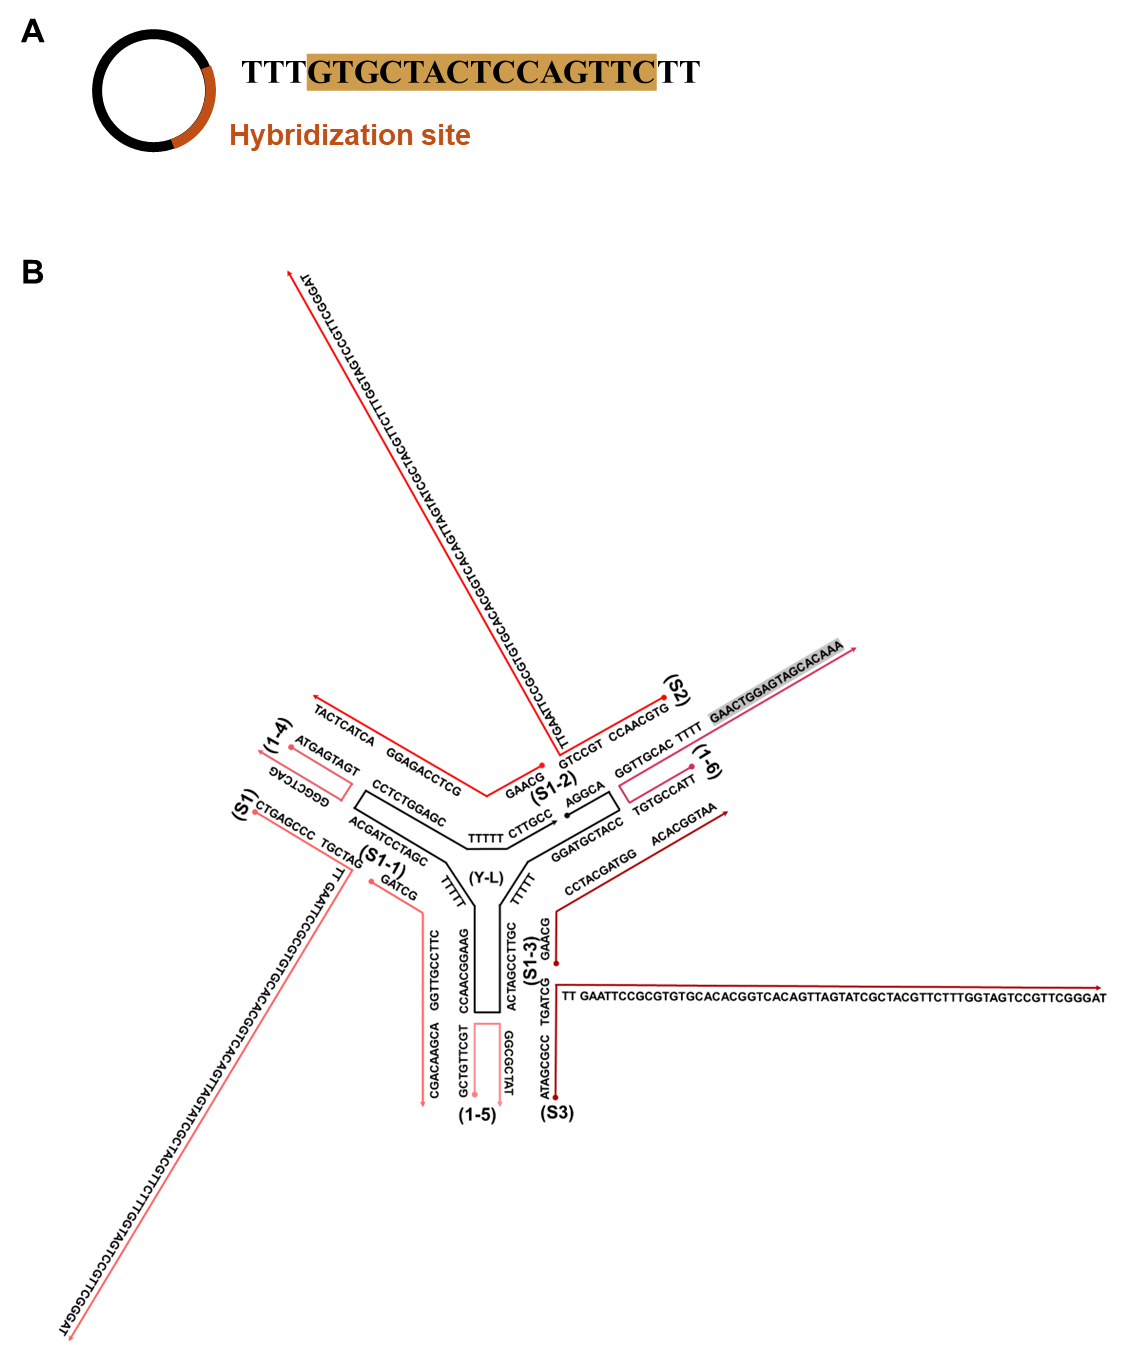


**Figure S1.** Illustration and sequence of the (**A**) template for RCA and (**B**) T structure. Highlighted sequence represents the hybridization site.


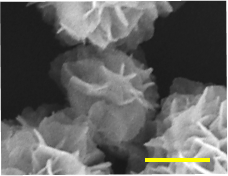


**Figure S2.** Scanning electron microscopy (SEM) imaging of the DNA Nano Flower. Scale bar: 100 nm.


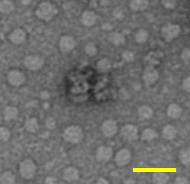


**Figure S3.** Transmission electron microscope (TEM) imaging of the TNF@Gin. Scale bar: 100 nm.


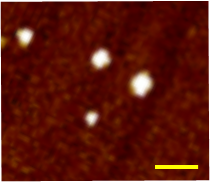


**Figure S4.** Atomic force microscope (AFM) imaging of the DNA Nano Flower under ScanAsyst-Air mode. Scale bar: 500 nm.


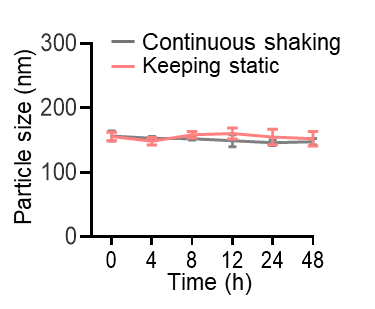


**Figure S5.** Particle size of TNF@Gin cultured under continuous shaking or static conditions.


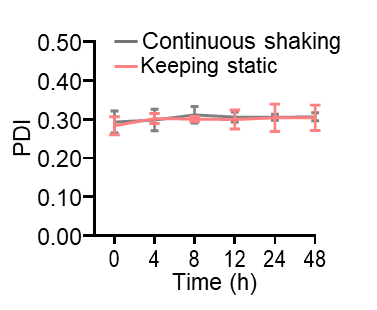


**Figure S6.** Polydispersity (PDI) of TNF@Gin cultured under continuous shaking or static conditions.


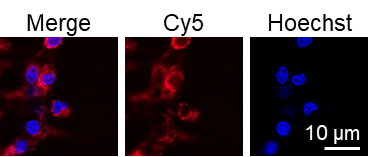


**Figure S7.** CLSM images of BV2 cells treated with Cy5-labeled TNF@Gin. Scale bar: 10 µm.


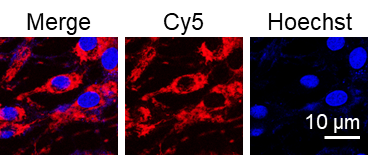


**Figure S8.** CLSM images of HT22 cells treated with Cy5-labeled TNF@Gin. Scale bar: 10 µm.


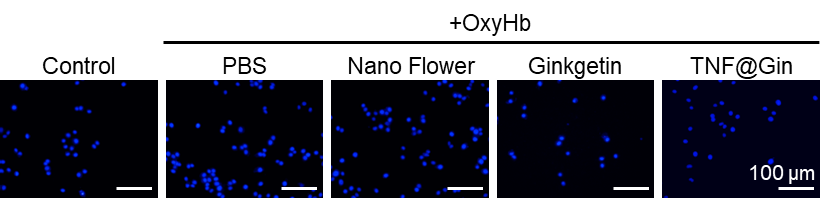


**Figure S9.** CLSM images of BV2 cells after different treatments. Scale bar: 100 µm.


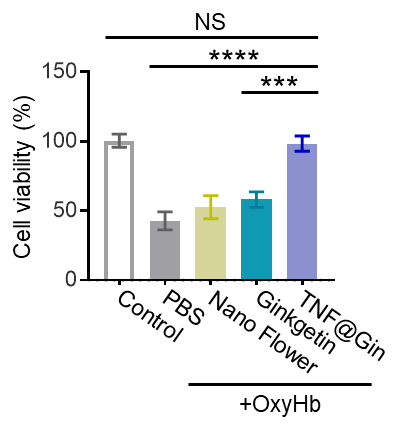


**Figure S10.** Cell viability of HT22 cells treated with different components 24 h after OxyHb intervention. The data are presented as mean ± SEM (n=3). Statistical significance was calculated by one-way analysis of variance (ANOVA) with the Tukey post hoc test, NS indicates not significant, *** p < 0.001, **** p < 0.0001.


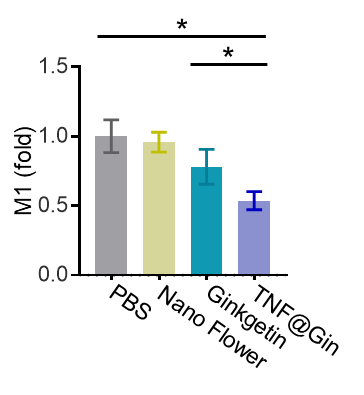


**Figure S11.** Level of M1 cell in various groups. The data are presented as mean ± SEM (n=3). Statistical significance was calculated by one-way analysis of variance (ANOVA) with the Tukey post hoc test, * p < 0.05.


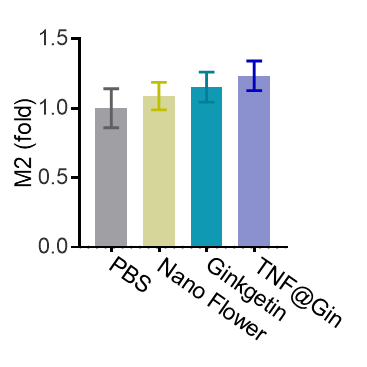


**Figure S12.** Level of M2 cells in various groups. The data are presented as mean ± SEM (n=3).


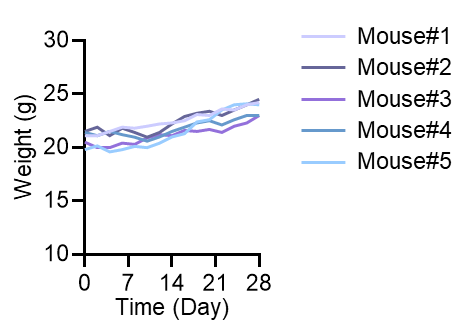


**Figure S13.** Body weight curves of the mice during the treatment of TNF@Gin.

# Supporting tables

**Table S1.** DNA sequences in this study.

| **Name** | **Sequence (5’-3’)** |
| --- | --- |
| **Template** | Phosphate-TTTGTGCTACTCCAGTTCTT |
| **L** | AGGCACCATCGTAGGTTTTTCGTTCCGATCACCAACGGAAGTTTTTCGATCCTAGCACCTCTGGAGCTTTTTCTTGCC |
| **S1-1** | GATCGCTTCCGTTGGACGAACAGCCCGA |
| **S1-2** | AAGCAAG GCTCCAGAGGACTACTCATCCGT |
| **S1-3** | GAACG CCTACGATGGACACGGTAACGAC |
| **S1** | CTGAGCCCTGCTAGTTGAATTCCGCGTGTGCACACGGTCACAGTTAGTATCGCTACGTTCTTTGGTAGTCCGTTCGGGAT |
| **S2** | GTGCAACCTGCCTGTTGAATTCCGCGTGTGCACACGGTCACAGTTAGTATCGCTACGTTCTTTGGTAGTCCGTTCGGGAT |
| **S**3 | ATAGCGCCTGATCGTTGAATTCCGCGTGTGCACACGGTCACAGTTAGTATCGCTACGTTCTTTGGTAGTCCGTTCGGGAT |
| **1-4** | ATGAGTAGTGGGCTCAG |
| **1-5** | GCTGTTCGTGGCGCTAT |
| **1-6** | TTACCGTGTGGTTGCACTTTTGAACTGGAGTAGCACAAA |
